# Supplementary material for: A CNGB1 Frameshift Mutation in Papillon and Phalène Dogs with Progressive Retinal Atrophy
Source: PLoS One. 2013 Aug 28;8(8):e72122. doi: 10.1371/journal.pone.0072122 (PMC3756049; doi:10.1371/journal.pone.0072122)
Supplement: Table S1 — Primers used for PCR amplification and sequencing of canine CNGB1 mRNA. (XLSX) [file pone.0072122.s001.xlsx]

## Sheet: Sheet1
Table S1. Primers used for canine CNGB1 mRNA.
Amplicon no.	Primer 1 (5´-3´)	Primer 2 (5´-3´)	Exons covered	Annealing T (°C)	Size (bp)
1	tgagcaagtgtcgggatgt	cagcctcaccaagtccatct	1-5	62	496
2	gtgaacagcagttccaacga	catcaacctggcagggtc	4-10	62	595
3	gaccctgccaggttgatg	gtgattgagctccacgtcct	10-14	62	585
4	cagcaggagctgcaggag	gatcctggccatcagtgc	14-17	62	589
5	catggtcgcctggtcaga	catggtcgcctggtcaga	17-20	62	597
6	tctacctcctggacatcacc	atgcagctgcggtagtaggt	20-25	62	591
7	cgggtttaccaacctcttca	tcggcctctttcttctcctc	26-32	62	600
