# Supplementary material for: A CNGB1 Frameshift Mutation in Papillon and Phalène Dogs with Progressive Retinal Atrophy
Source: PLoS One. 2013 Aug 28;8(8):e72122. doi: 10.1371/journal.pone.0072122 (PMC3756049; doi:10.1371/journal.pone.0072122)
Supplement: Table S2 — Summary of the exome sequencing data analysis of each sequenced individual dog. (XLSX) [file pone.0072122.s002.xlsx]

## Sheet: Sheet1
Table S2. Results of the exome sequencing data.
Sample	Total number of reads	Reads aligned to CanFam2.1 (%)	Reads mapped in target region (%)	Mean depth in target region	Fraction covered by ≥1x	Fraction covered by ≥5x	Fraction covered by ≥20x	Fraction covered by≥30x	Fraction covered by ≥100x	Number of SNVs*	Number of indels
Unaffected parent 1	129200136	97.09	76.62	87.6	99	94.2	75.7	66.3	32.2	75878	14273
Unaffected parent 2	114545590	97.32	76.24	98.33	99	94.2	75.5	66.1	31.7	74176	14280
Affected proband	93254508	97.29	75.45	101.46	98.7	92.9	72.1	62.5	28.5	72935	13860
Average	1.12333e+08	97.2333	76.1033	95.7967	98.9	93.7667	74.4333	64.9667	30.8	74329.7	14137.7
* Single nucleotide variant
